# Supplementary material
Source: PubMed Central journal article supplement (PMC6072133)
Supplement: MD-008-C6MD00701E-s001.pdf [file MD-008-C6MD00701E-s001.pdf]

**Table S1:** Distribution of compounds corresponding to each target used in PCM modelling

| Target                                                | Gene name     | PDB  | No. of compounds<br>per target |
|-------------------------------------------------------|---------------|------|--------------------------------|
| Thrombin                                              | F2            | 1QUR | 2822                           |
| Coagulation Factor Xa                                 | F10           | 2XBW | 2779                           |
| Urokinase-type Plasminogen Activator                  | PLAU          | 1OWE | 561                            |
| Plasminogen                                           | PLG           | 1DDJ | 415                            |
| Tissue-Type Plasminogen Activator                     | PLAT          | 1RTF | 184                            |
| Suppressor of tumorigenicity 14<br>protein/Matriptase | ST14 / MT-SP1 | 1EAX | 176                            |
| Coagulation Factor IXa                                | F9            | 1RFN | 142                            |
| Alpha Trypsin                                         | TPSAB1        | 1LTO | 128                            |
| Beta-1 Trypsin                                        | TPSAB1        | 2FPZ | 114                            |
| Chymase                                               | CMA1          | 3N7O | 100                            |
| Complement C1s subcomponent                           | C1S           | 1ELV | 91                             |
| Plasma Kallikrein                                     | KLKB1         | 2ANY | 81                             |
| Activated Protein C                                   | PROC          | 1AUT | 61                             |
| Coagulation Factor XIa                                | F11           | 3BG8 | 54                             |
| Kallikrein-1                                          | KLK1          | 1SPJ | 51                             |
| Kallikrein-3                                          | KLK3          | 2ZCH | 44                             |
| Kallikrein-7                                          | KLK7          | 2QXI | 27                             |
| Prostasin                                             | PRSS8         | 3DFJ | 23                             |
| Granzyme B                                            | GZMB          | 1IAU | 20                             |
| Coagulation Factor XIIa                               | F12           | 4XDE | 17                             |
| Kallikrein-5                                          | KLK5          | 2PSX | 14                             |
| Trypsin-3                                             | PRSS3         | 1H4W | 2                              |
| Hepsin                                                | HPN           | 1Z8G | 1                              |
| Complement C1r subcomponent                           | C1R           | 1MD8 | 1                              |

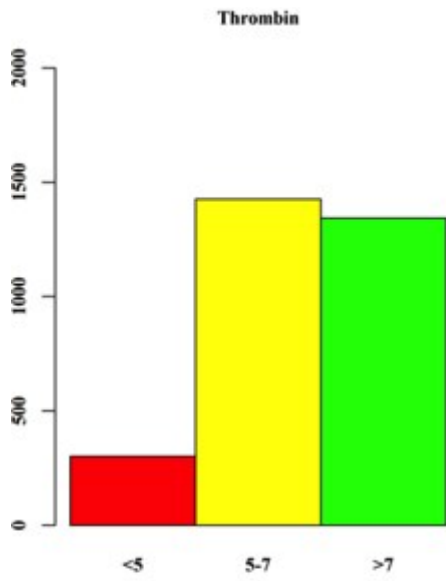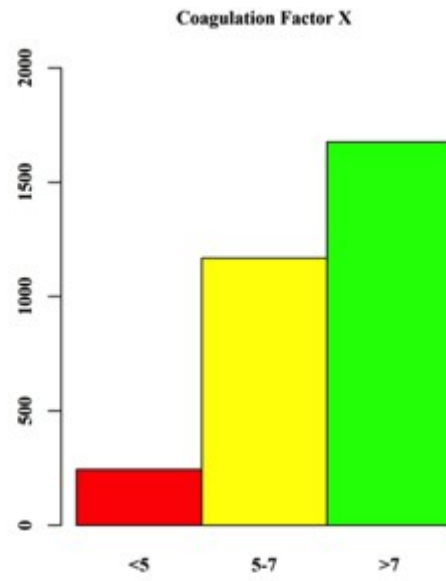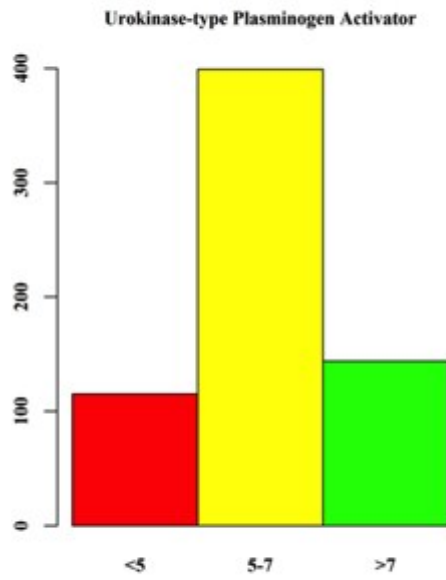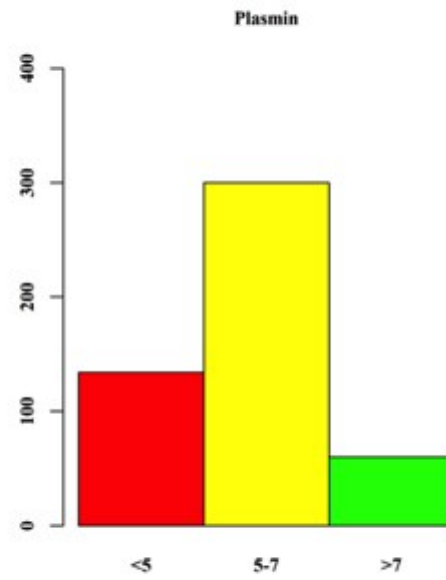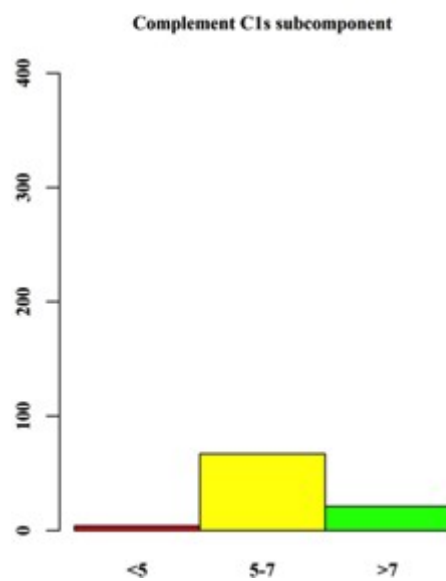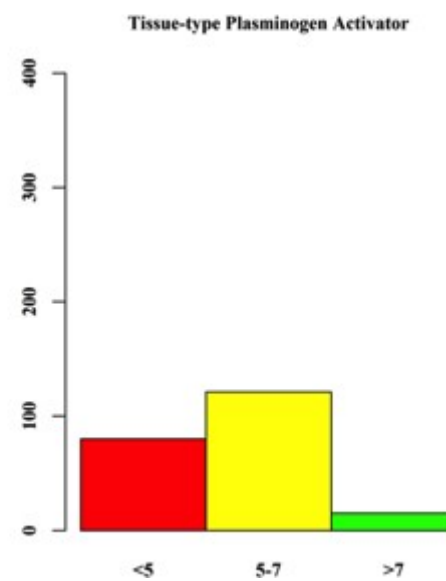

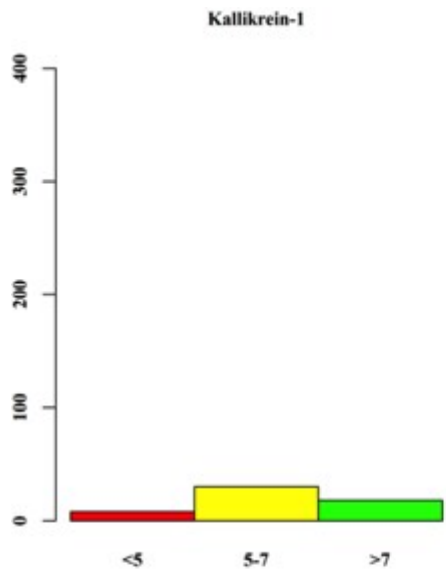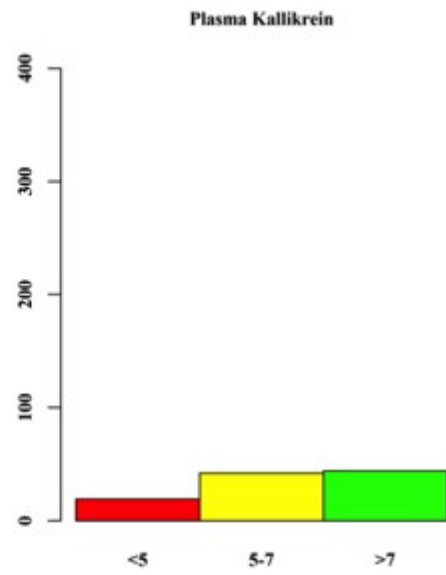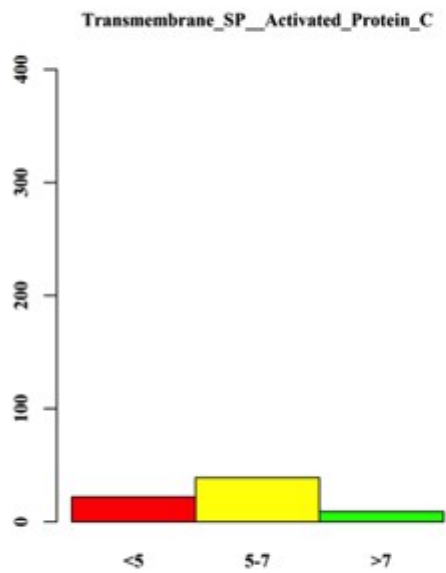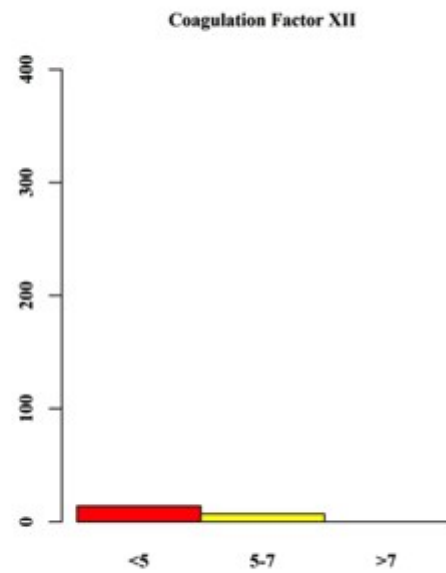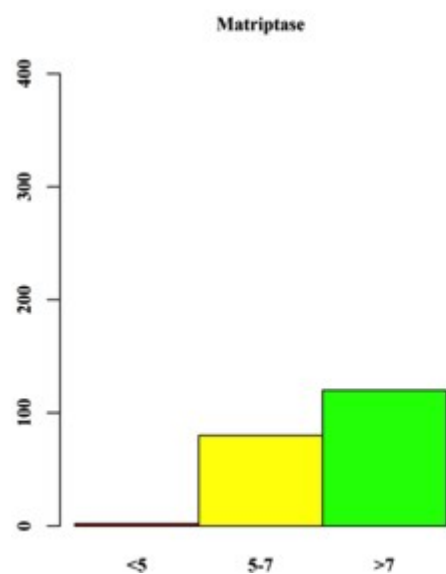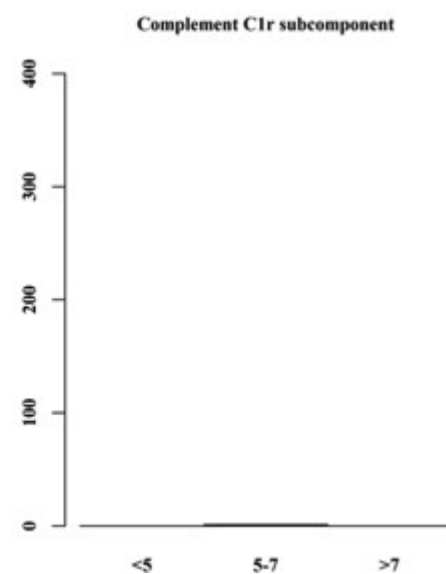

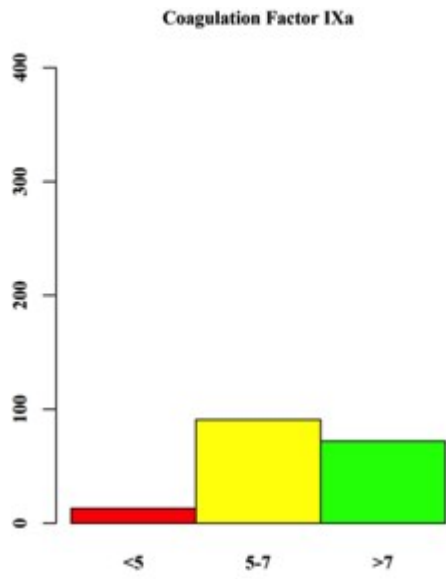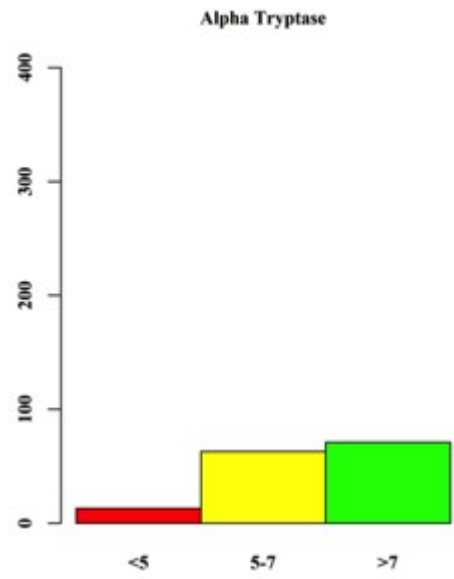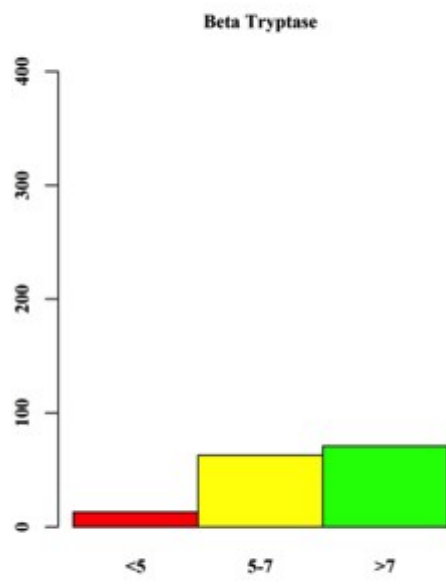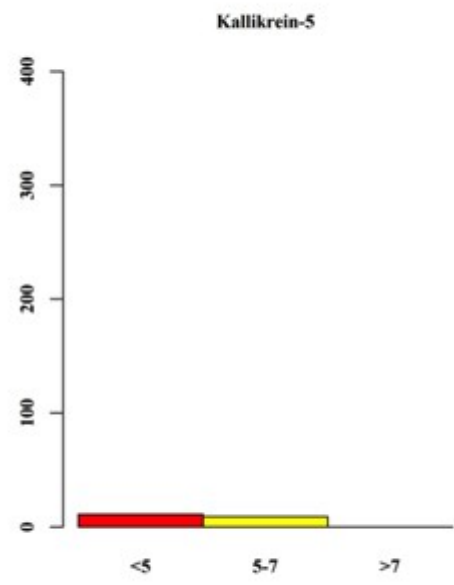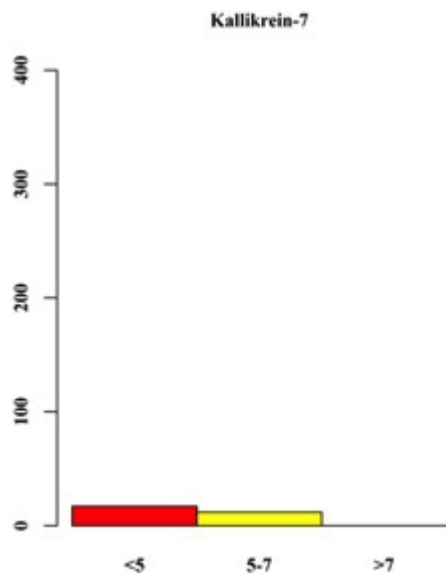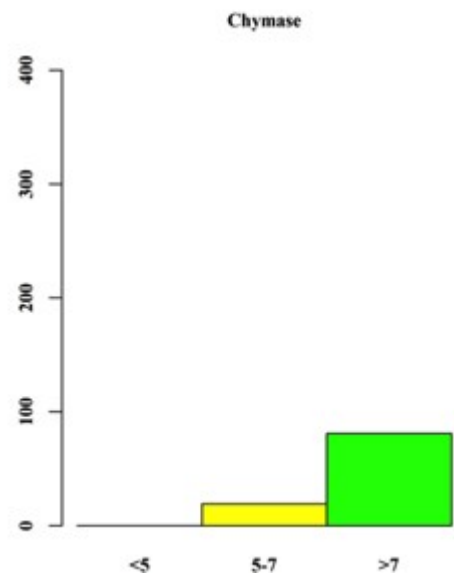

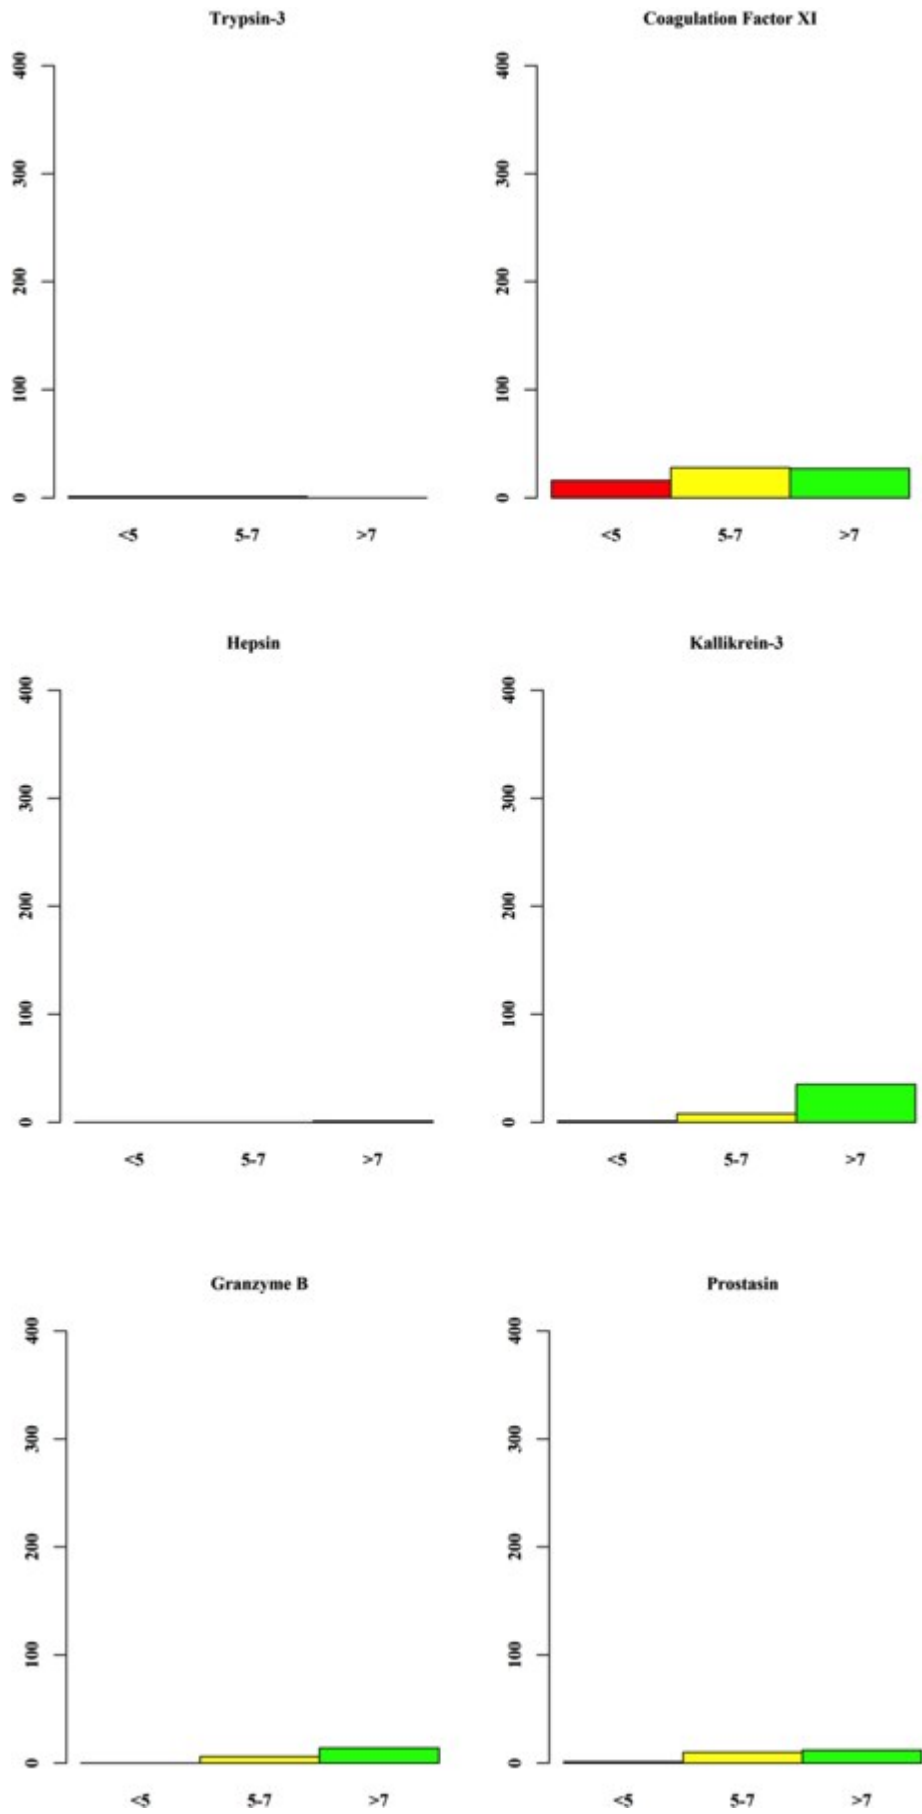

Figure S1.  $pK_i$  distributions of the 24 serine proteases

**Table S2:** Protein and ligand features used in PCM modelling after RFE

| Protein descriptors                                 | Ligand descriptors | No. of protein features | No. of ligand features | No. of cross-terms in PLS models |
|-----------------------------------------------------|--------------------|-------------------------|------------------------|----------------------------------|
| <b>Field-based models</b>                           |                    |                         |                        |                                  |
| Polar, lipophilic, stable and unstable water fields | RDkit              | 72                      | 250                    | 18000                            |
| Polar, lipophilic, stable and unstable water fields | MOE                | 90                      | 160                    | 14240                            |
| Polar, lipophilic, stable and unstable water fields | 4-PFP              | 20                      | 438                    | 8760                             |
| Polar, lipophilic, stable and unstable water fields | Grind              | 10                      | 94                     | 940                              |
| <b>Sequence-based models</b>                        |                    |                         |                        |                                  |
| Amino acid and dipeptide composition                | RDkit              | 15                      | 167                    | -                                |
| Autocorrelation descriptors                         | RDkit              | 20                      | 185                    | -                                |
| Composition, transition and distribution            | RDkit              | 21                      | 186                    | -                                |
| Sequence order and Pseudo amino acid composition    | RDkit              | 15                      | 148                    | -                                |

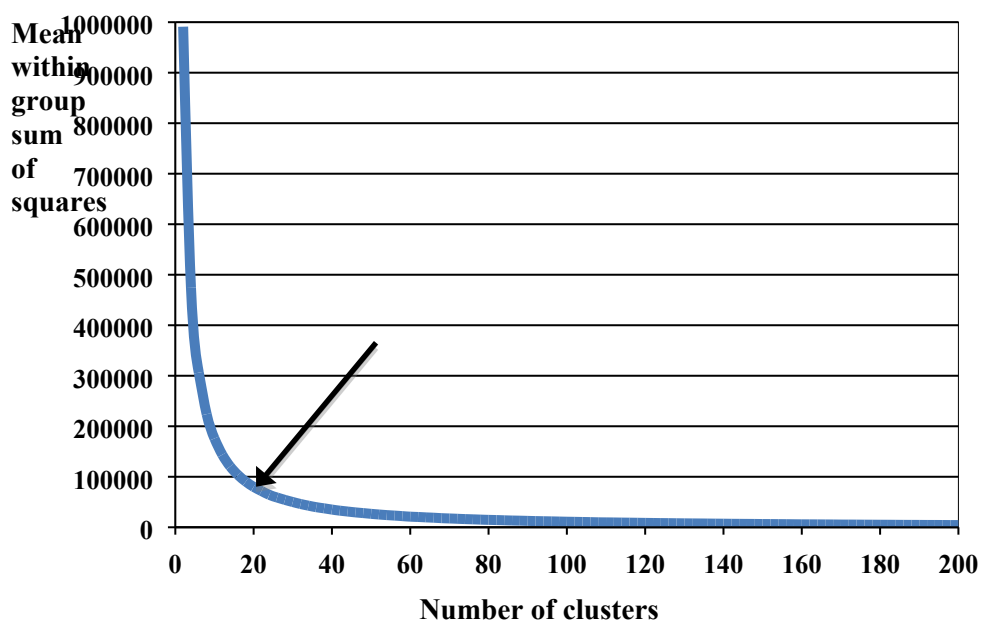

**Figure S2.** Plot of number of clusters against the mean within group sum of squares. Arrow pointer in the figure shows the optimal number of clusters chosen based on the Elbow method

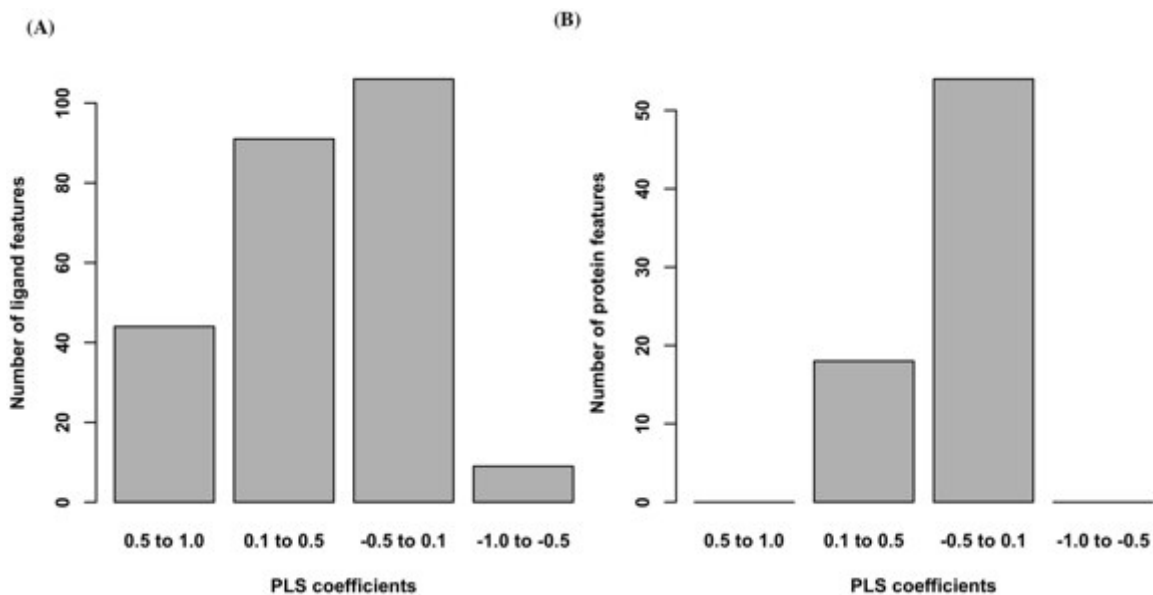

**Figure S3:** Distribution of the PLS coefficients of ligand (A) and protein features (B) used in PCM modelling

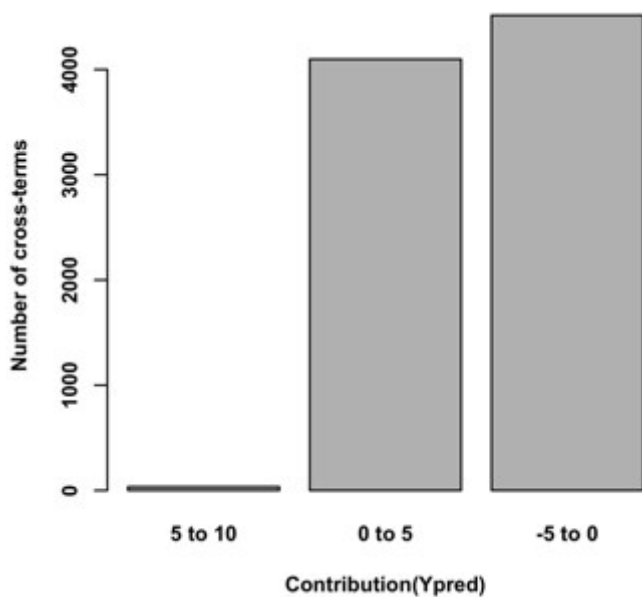

**Figure S4:** Distribution of the component contribution values of the cross-terms that have a positive effect on the interactions of CHEMBL73193 and coagulation factor 10

**Table S3:** Permutation validation results of RF and PLS models

| Ligand descriptors | R <sup>2</sup> | Q <sup>2</sup> | R <sup>2</sup> intercept | Q <sup>2</sup> intercept | Random Permutation Models |                     |
|--------------------|----------------|----------------|--------------------------|--------------------------|---------------------------|---------------------|
|                    |                |                |                          |                          | Mean R <sup>2</sup>       | Mean Q <sup>2</sup> |
| <b>RF models</b>   |                |                |                          |                          |                           |                     |
| RDkit              | 0.957          | 0.737          | -0.094                   | -8.851                   | -0.095                    | -8.850              |
| MOE                | 0.961          | 0.703          | -0.116                   | -7.589                   | -0.116                    | -7.588              |
| 4-PFP              | 0.928          | 0.566          | -0.089                   | -8.802                   | -0.089                    | -8.801              |
| Grind              | 0.951          | 0.430          | -0.127                   | -10.473                  | -0.127                    | -10.472             |
| <b>PLS models</b>  |                |                |                          |                          |                           |                     |
| RDkit              | 0.671          | 0.588          | 0.162                    | -0.162                   | 0.166                     | -0.153              |
| MOE                | 0.504          | 0.433          | 0.056                    | -0.153                   | 0.063                     | -0.141              |
| 4-PFP              | 0.554          | 0.451          | 0.163                    | -0.089                   | 0.174                     | -0.092              |
| Grind              | 0.311          | 0.264          | 0.033                    | -0.055                   | 0.035                     | -0.050              |

**Table S4.** *K<sub>s</sub>* of compounds CHEMBL73193 and CHEMBL315014 interacting with different serine proteases.

| Serine Protease        | <i>K<sub>i</sub></i> (nM) |              |
|------------------------|---------------------------|--------------|
|                        | CHEMBL73193               | CHEMBL315014 |
| F10                    | 0.11                      | 85           |
| Thrombin               | 2000                      | >5000        |
| Trypsin I (Bos Taurus) | 280                       | 1400         |



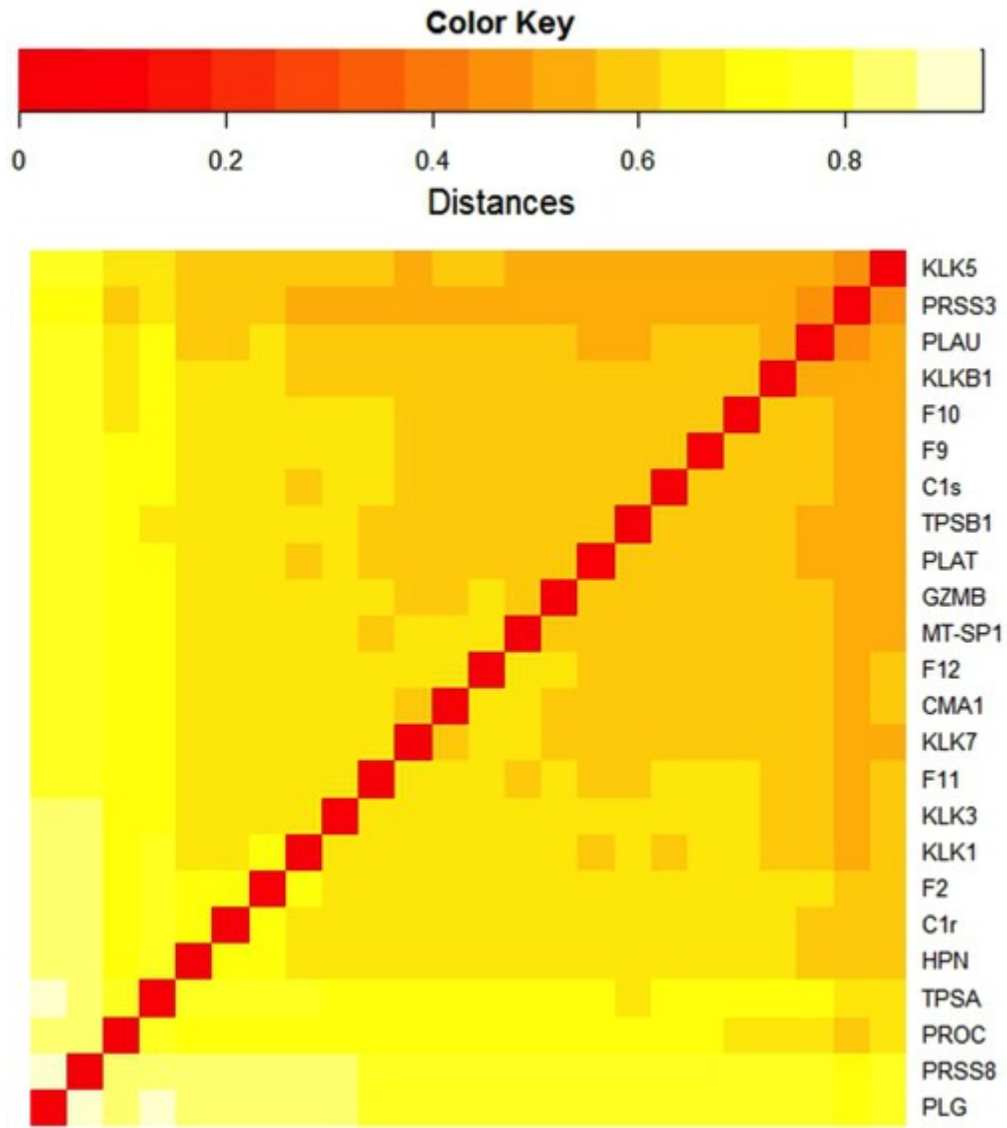

**Figure S5.** Distance-based heatmaps of 24 proteases based on their protein fields.

**Table S5.** Prediction performances of RDKit based Random Forest models after excluding one target at a time.

| Excluded target                      | Correlation (R <sup>2</sup> ) | Predictability (Q <sup>2</sup> ) | RMSEE | RMSEP <sub>test</sub> | R <sup>2</sup> <sub>test</sub> |
|--------------------------------------|-------------------------------|----------------------------------|-------|-----------------------|--------------------------------|
| Coagulation Factor XII               | 0.957                         | 0.738                            | 0.36  | 1.45                  | 0.614                          |
| Kallikrein-5                         | 0.957                         | 0.739                            | 0.35  | 1.16                  | 0.549                          |
| Coagulation Factor XI                | 0.957                         | 0.739                            | 0.35  | 1.32                  | 0.524                          |
| Prostasin                            | 0.957                         | 0.739                            | 0.36  | 0.92                  | 0.455                          |
| Kallikrein-7                         | 0.957                         | 0.737                            | 0.36  | 1.3                   | 0.452                          |
| Plasma Kallikrein                    | 0.957                         | 0.74                             | 0.36  | 1.32                  | 0.399                          |
| Kallikrein-1                         | 0.957                         | 0.738                            | 0.36  | 0.9                   | 0.34                           |
| Tissue-Type Plasminogen Activator    | 0.957                         | 0.89                             | 0.36  | 1.24                  | 0.248                          |
| Activated protein C                  | 0.957                         | 0.738                            | 0.35  | 1.09                  | 0.226                          |
| Coagulation Factor IX                | 0.957                         | 0.738                            | 0.36  | 1.34                  | 0.153                          |
| Alpha tryptase                       | 0.958                         | 0.742                            | 0.35  | 1.31                  | 0.144                          |
| Granzyme B                           | 0.957                         | 0.738                            | 0.36  | 1.24                  | 0.122                          |
| Plasmin                              | 0.956                         | 0.729                            | 0.36  | 1.18                  | 0.106                          |
| Complement C1s subcomponent          | 0.957                         | 0.739                            | 0.36  | 0.758                 | 0.1                            |
| Beta-1 tryptase                      | 0.958                         | 0.74                             | 0.35  | 1.33                  | 0.068                          |
| Urokinase-type Plasminogen Activator | 0.957                         | 0.737                            | 0.36  | 1.139                 | 0.039                          |
| Thrombin                             | 0.958                         | 0.746                            | 0.35  | 1.61                  | 0.034                          |
| Coagulation Factor X                 | 0.957                         | 0.735                            | 0.33  | 2.13                  | 0.001                          |
| Kallikrein-3                         | 0.957                         | 0.739                            | 0.36  | 1.56                  | 0                              |
| Chymase                              | 0.957                         | 0.739                            | 0.36  | 1.45                  | 0                              |
| Matriptase                           | 0.958                         | 0.743                            | 0.35  | 1.63                  | 0                              |
| Complement C1r subcomponent          | 0.957                         | 0.739                            | 0.35  | 0.736                 | NA                             |
| Hepsin                               | 0.957                         | 0.739                            | 0.35  | 2.65                  | NA                             |
| Trypsin-3                            | 0.957                         | 0.739                            | 0.36  | 0.49                  | NA                             |

NAs used for R<sup>2</sup><sub>test</sub> of proteases that have only 1 or 2 observations in test set.

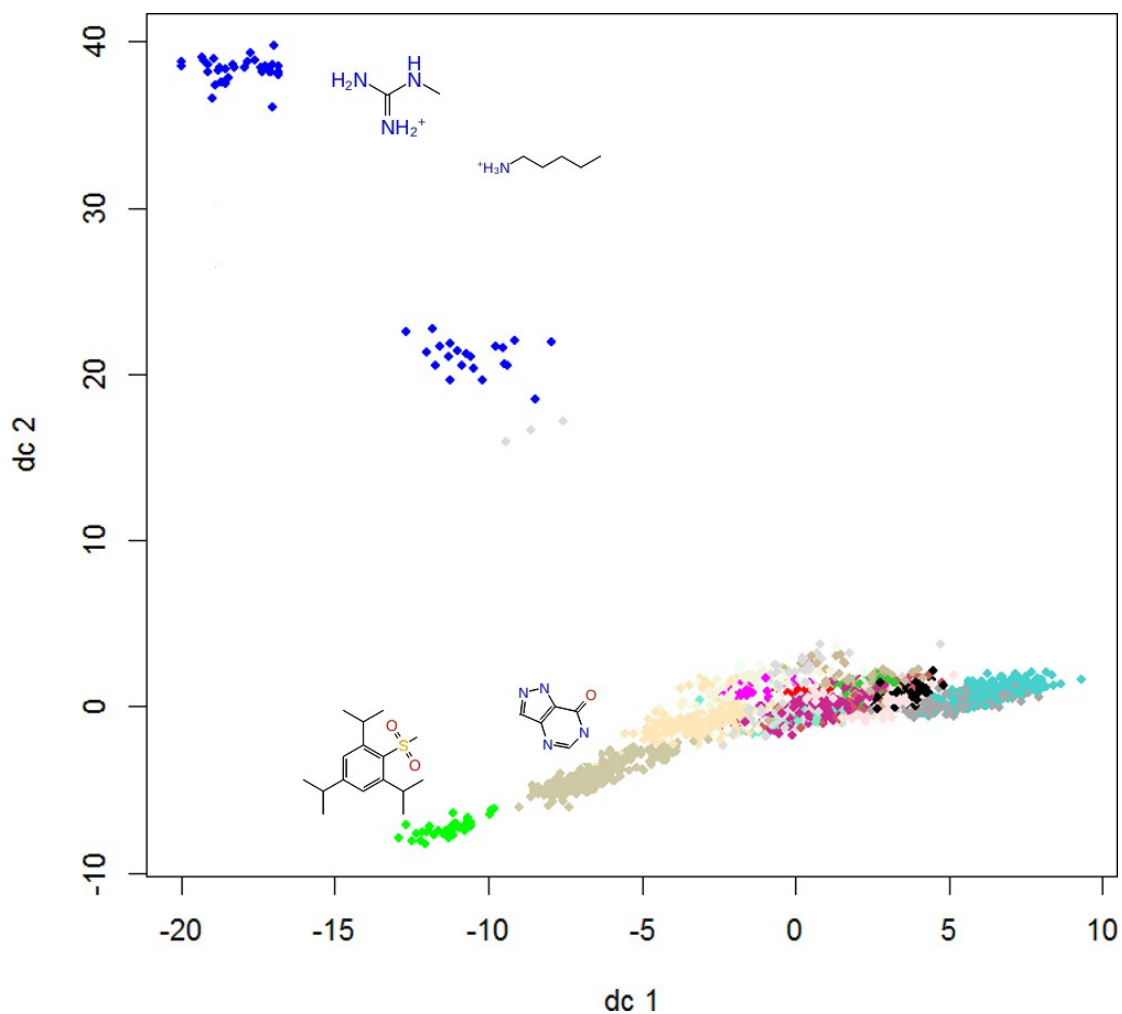

**Figure S6.** Distribution of the 20 compound clusters in 2 dimensions. Clusters shown here are obtained by performing k-means clustering based on the RDkit fingerprints of the compounds. Different colours represent the different clusters. C3, C4 and C17 refer to the cluster numbers and the scaffolds shown in these clusters represent the most common ones. dc1 and dc2 shown in labels correspond to discriminant coordinates.

**Table S6.** Prediction performances of RDkit based Random Forest models after excluding one compound cluster at a time.

| Excluded compound cluster | No. of datapoints | Correlation ( $R^2$ ) | Predictability ( $Q^2$ ) | RMSEE | RMSEP <sub>test</sub> | $R^2_{test}$ |
|---------------------------|-------------------|-----------------------|--------------------------|-------|-----------------------|--------------|
| C9                        | 113               | 0.498                 | 0.263                    | 1.32  | 1.08                  | 0.017        |
| C2                        | 134               | 0.517                 | 0.266                    | 1.32  | 1.09                  | 0.001        |
| C10                       | 77                | 0.511                 | 0.265                    | 1.32  | 1.33                  | 0.036        |
| C19                       | 130               | 0.486                 | 0.25                     | 1.33  | 1.33                  | 0.003        |
| C3                        | 112               | 0.497                 | 0.261                    | 1.32  | 1.35                  | 0            |
| C18                       | 637               | 0.523                 | 0.261                    | 1.33  | 1.46                  | 0.002        |

|     |      |       |       |      |      |       |
|-----|------|-------|-------|------|------|-------|
| C5  | 426  | 0.494 | 0.255 | 1.33 | 1.47 | 0.013 |
| C8  | 675  | 0.486 | 0.252 | 1.33 | 1.48 | 0.003 |
| C16 | 1656 | 0.488 | 0.269 | 1.34 | 1.48 | 0     |
| C7  | 522  | 0.496 | 0.253 | 1.33 | 1.54 | 0.004 |
| C6  | 894  | 0.493 | 0.255 | 1.32 | 1.55 | 0.001 |
| C20 | 289  | 0.517 | 0.274 | 1.31 | 1.61 | 0.009 |
| C13 | 141  | 0.508 | 0.227 | 1.31 | 1.61 | 0.003 |
| C1  | 360  | 0.493 | 0.256 | 1.32 | 1.63 | 0.006 |
| C4  | 67   | 0.504 | 0.268 | 1.31 | 1.65 | 0.037 |
| C12 | 253  | 0.505 | 0.265 | 1.31 | 1.67 | 0.003 |
| C14 | 623  | 0.476 | 0.259 | 1.31 | 1.74 | 0.023 |
| C15 | 232  | 0.514 | 0.268 | 1.31 | 1.74 | 0.001 |
| C11 | 299  | 0.504 | 0.261 | 1.31 | 1.91 | 0     |
| C17 | 268  | 0.505 | 0.268 | 1.29 | 2.29 | 0     |

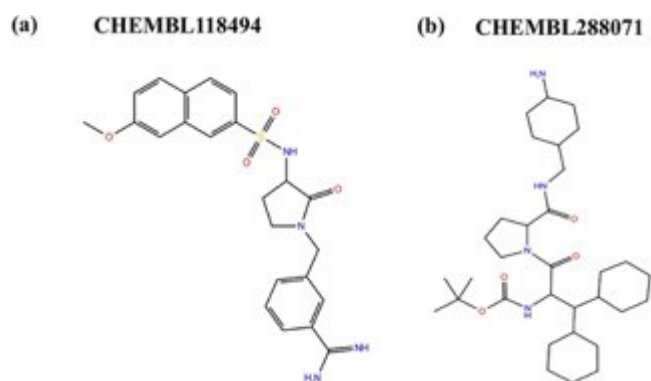

**Figure S7.** Chemical structures of the outlier compounds highlighted in Figure 4b
